# Supplementary material for: Substituent and solvent effects on the fluorescent and photochromic properties of 2-(2-pyridyl)imidazole containing diarylethene derivatives
Source: Royal Society of Chemistry journal article supplement (doi:10.1039/c3ra43110j), 2013-01-01

# Supporting information

## Substituent and solvent effects on the fluorescent and photochromic properties of 2-(2-pyridyl) imidazole containing diarylethene derivatives

Xuefeng Peng,<sup>ab</sup> Jian-Guo Deng,<sup>b</sup> and Hai-Bing Xu<sup>\*bc</sup>

<sup>a</sup>State Key Laboratory of Applied Organic Chemistry, Lanzhou University, Lanzhou 730000, China; <sup>b</sup>New Materials R&D Center, Key Laboratory of science and Technology on high energy laser, Institute of Chemical Materials, China Academy of Engineering Physics, Chengdu, Sichuan 610200, China; <sup>c</sup>State Key Laboratory of Structural Chemistry, Fujian Institute of Research on the Structure of Matter, Chinese Academy of Sciences, Fuzhou, Fujian 350002, China.

### Table of contents

|                                             |    |
|---------------------------------------------|----|
| 1.Lippert-Mataga equations .....            | 2  |
| 2.Absorption and fluorescence spectra ..... | 3  |
| 3.Fatigue resistance .....                  | 5  |
| 4.Solvent effect .....                      | 5  |
| 5.Reference .....                           | 6  |
| 6.Copies of <sup>1</sup> H NMR.....         | 6  |
| 7. Copies of <sup>13</sup> C NMR.....       | 11 |

## 1. Lippert-Mataga equations

$$\Delta\nu = \nu_{ab} - \nu_{fl} = \frac{2\Delta f(\mu_e - \mu_g)^2}{hca^3} + C \quad (1)$$

$$a = (3M/4N\pi d)^{1/3} \quad (2)$$

$$\Delta f = f - \frac{1}{2}f' = \frac{\varepsilon - 1}{2\varepsilon + 1} - \frac{1}{2} \frac{n^2 - 1}{n^2 + 1} \quad (3)$$

Where,  $\nu_{ab}$  and  $\nu_{fl}$  are the wave numbers of the absorption and emission maxima, respectively,  $\mu_e$  and  $\mu_g$  is the excited state and ground state dipole moments of a solute,  $h$  is the Planck's constant,  $c$  is the velocity of light in vacuum,  $a$  (Å) is Onsager radius of solute, which can be derived from the Avogadro number  $N$ , molecular weight  $M$ , and density  $d$  of solute.  $C$  is a constant. The solvent polarity parameter  $\Delta f$  is a function of the dielectric constant  $\varepsilon$  and the refractive index  $n$ .<sup>1</sup>

## 2. Absorption and fluorescence spectra

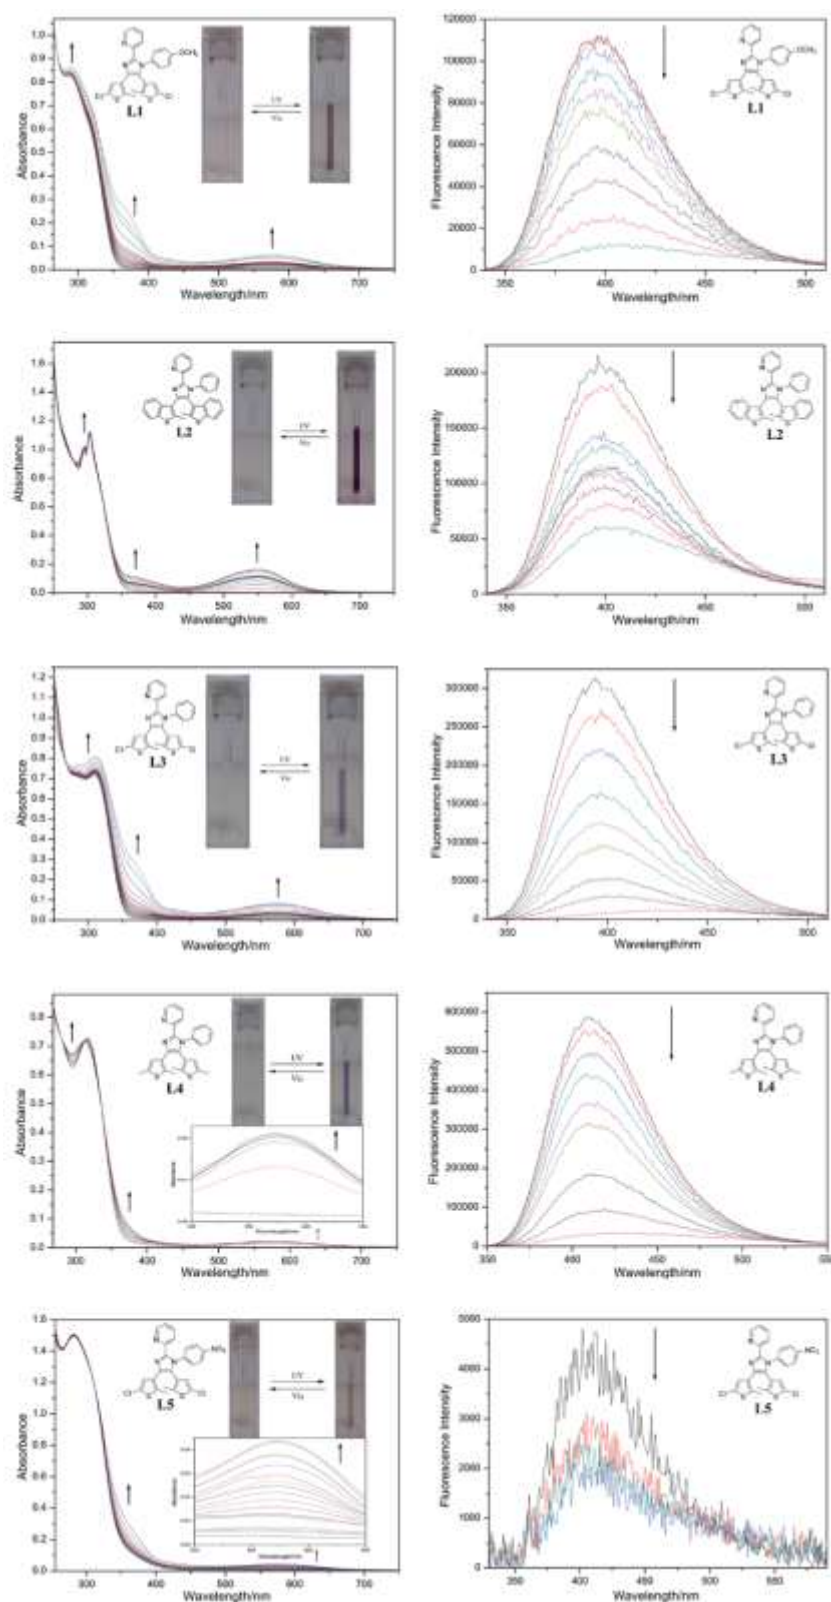

**Figure S1.** Absorption spectra (left, the insets show the reversible color changes between the open forms and photostationary states) and emission spectra ( $\lambda_{\text{ex}} = 325$  nm, right) of **L1–L5** ( $5 \times 10^{-5}$  mol/L) in  $\text{CH}_2\text{Cl}_2$  upon irradiation with UV light.

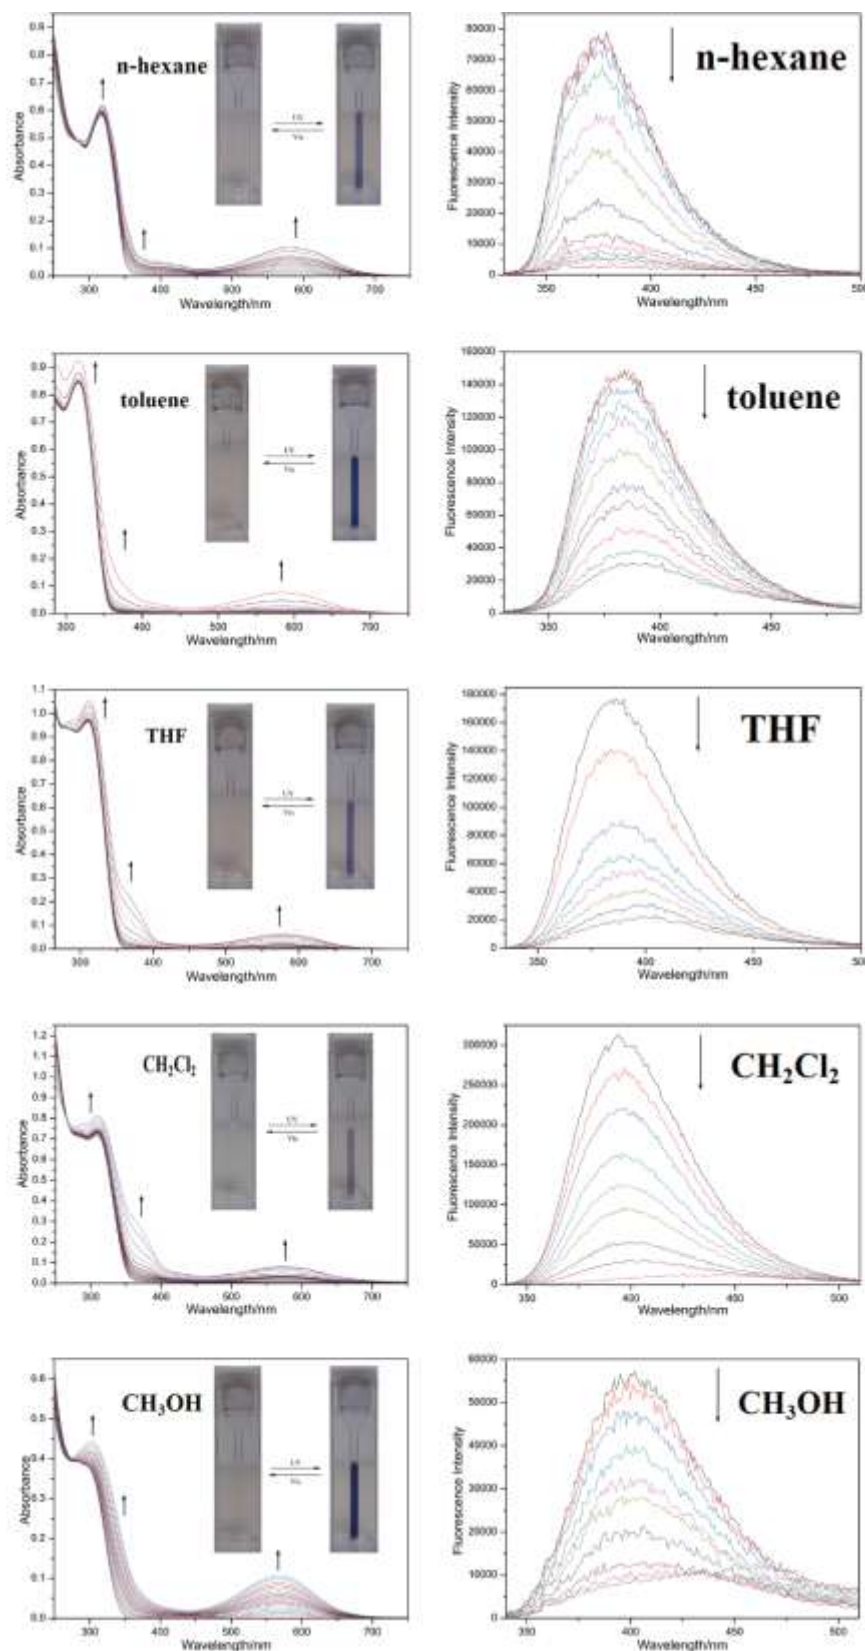

**Figure S2.** Absorption spectra (left, the insets show the reversible color changes between the open forms and photostationary states) and emission spectra ( $\lambda_{\text{ex}} = 325$  nm, right) of **L3** ( $5 \times 10^{-5}$  mol/L) in various solutions upon irradiation with UV light.

### 3. Fatigue resistance

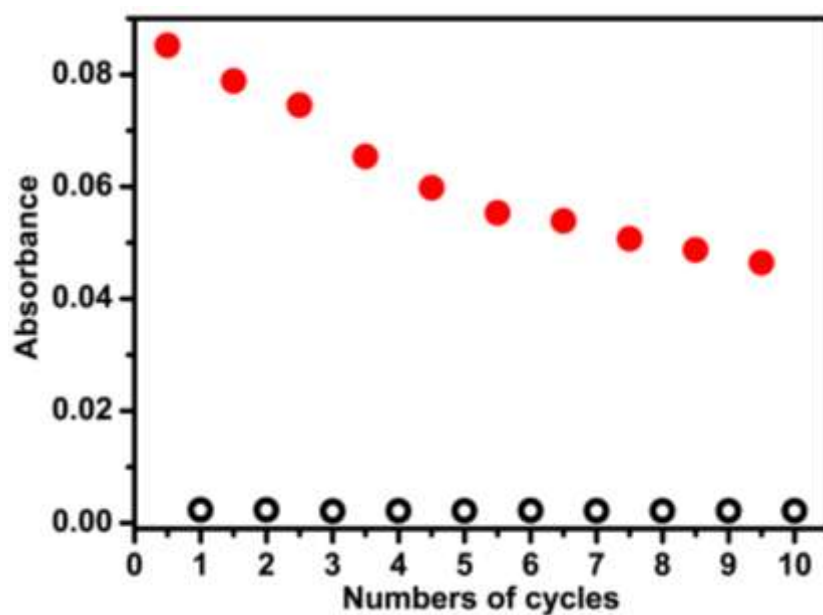

**Figure S3.** Fatigue resistance of **L3** ( $5 \times 10^{-5}$  mol/L) was tested in degassed  $\text{CH}_2\text{Cl}_2$  by alternatively irradiating with the UV ( $\lambda = 302$  nm) and the visible light ( $\lambda = 520$  nm) (open (○) and closed (●) form), monitored by the absorbance at 572 nm.

### 4. Solvent effect

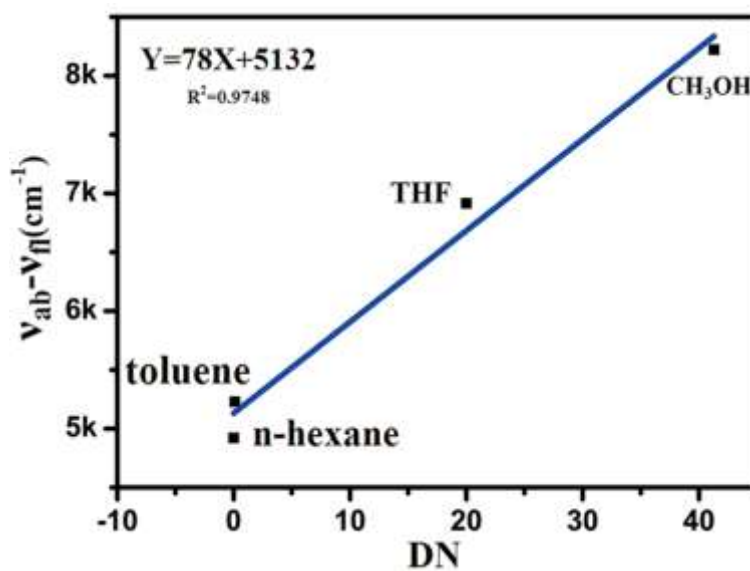

**Figure S4.** Linear relationship between the Stokes shift ( $\Delta\nu$ ) values of **L3** in various solvents and the DN.

## 5.Reference

1. Reichardt, C.; Welton, T., *Solvents and Solvent Effects in Organic Chemistry 4rd Edition*. WILEY-VCH Verlag GmbH & Co. KGaA, Weinheim: Germany, 2011.

## 6.Copies of $^1\text{H}$ NMR

(1) 2-methylbenzo[b]thiophen-3-ylboronic acid (**5**)

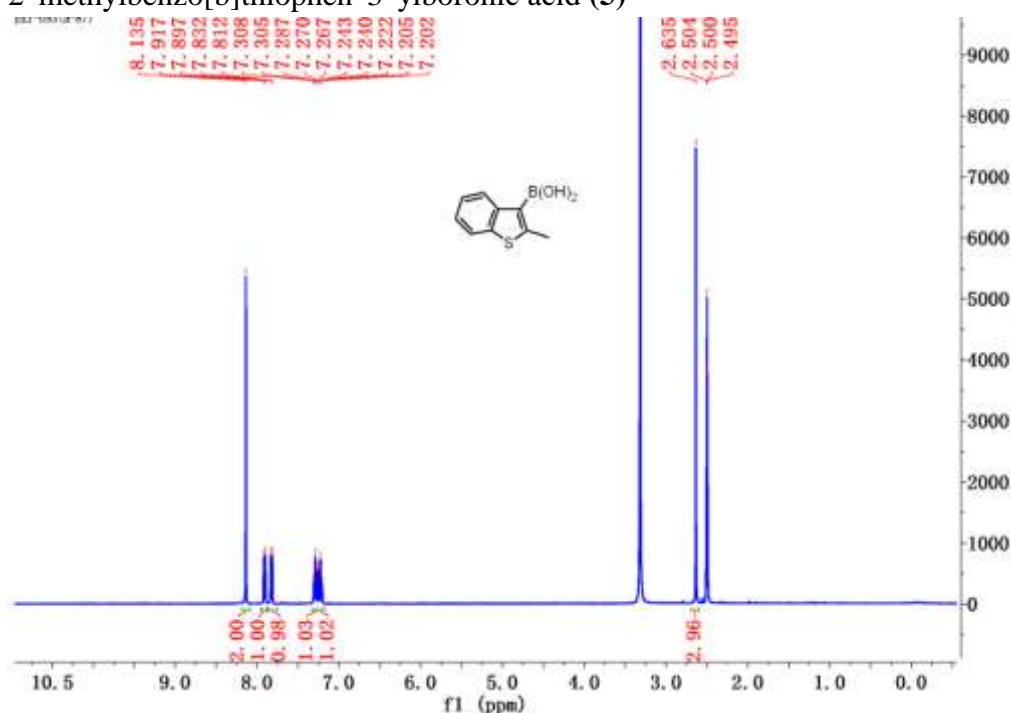

(2) 1-(4-methoxyphenyl)-2-(2-pyridyl)imidazole (**9**)

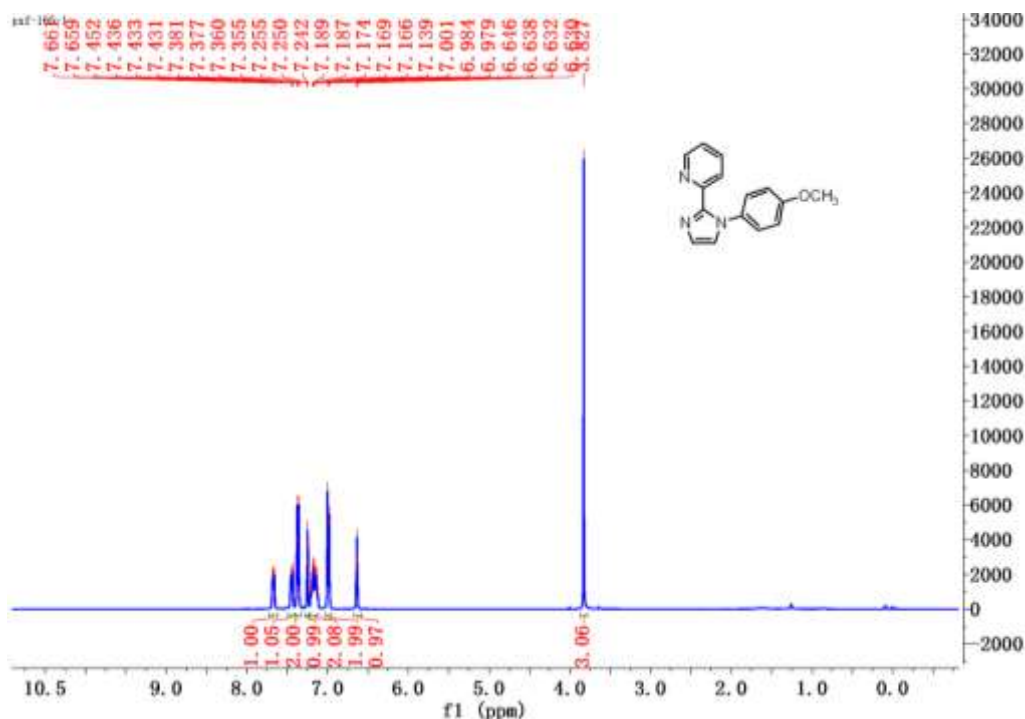

(3) 1-(4-nitrophenyl)-2-(2-pyridyl)imidazole (**11**)

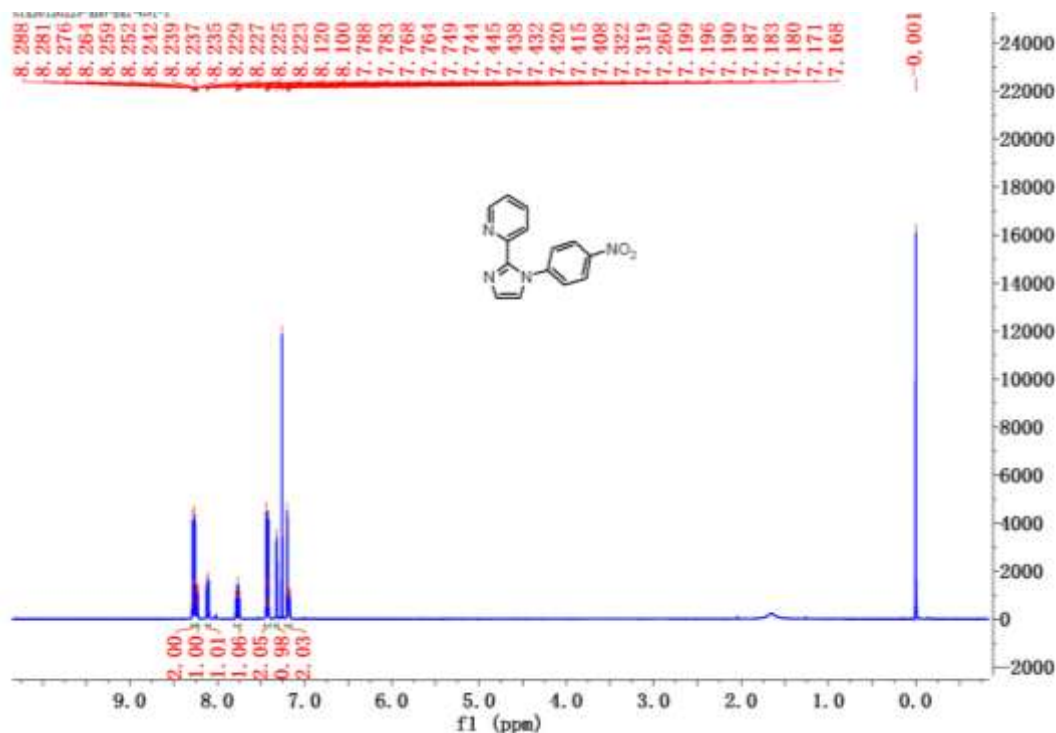

(4) 1-(4-methoxyphenyl)-4,5-dibromo-2-(2-pyridyl)imidazole (**12**)

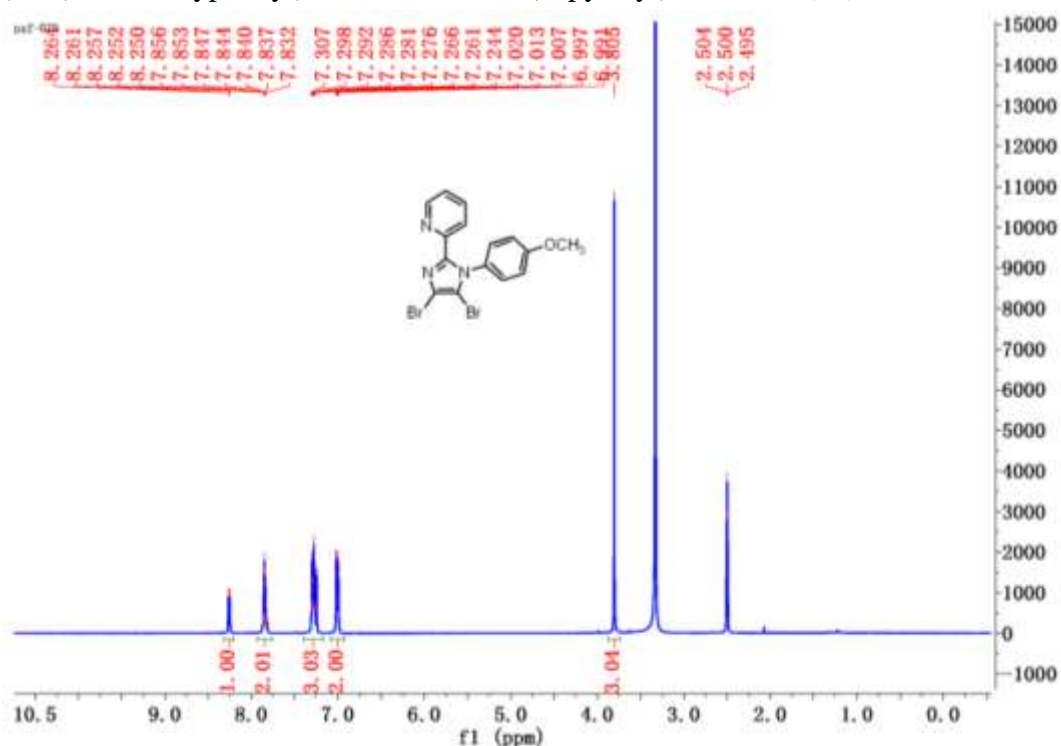



(5) 1-phenyl-4,5-dibromo-2-(2-pyridyl)imidazole (**13**)

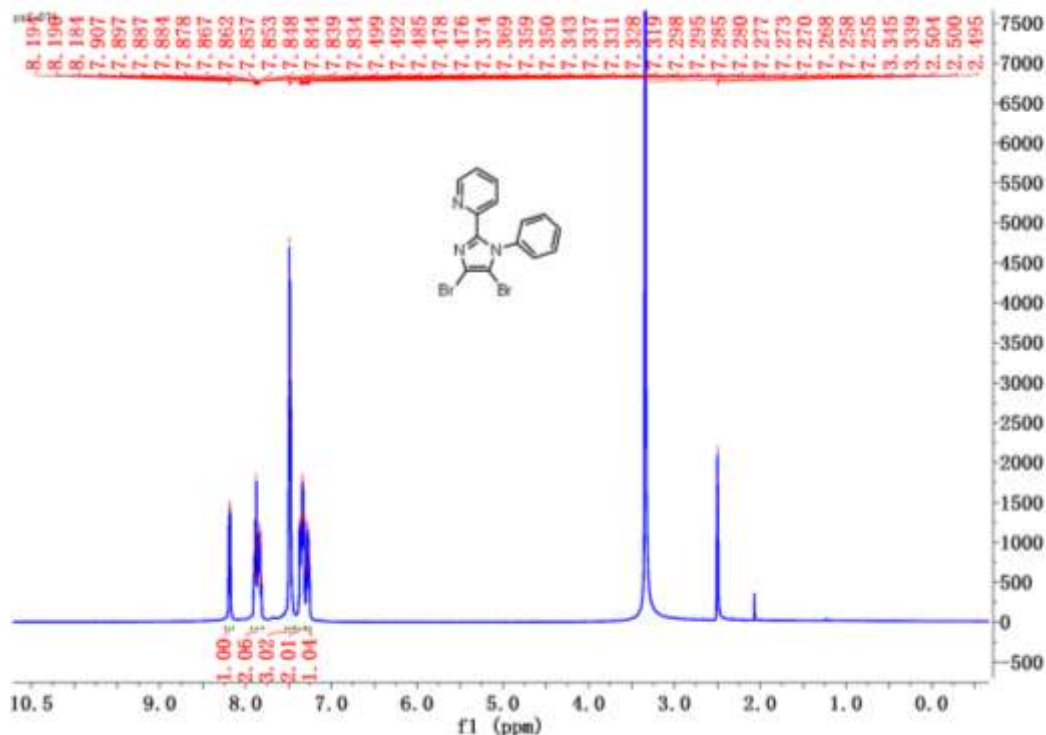

(6) 1-(4-nitrophenyl)-4,5-dibromo-2-(2-pyridyl)imidazole (**14**)

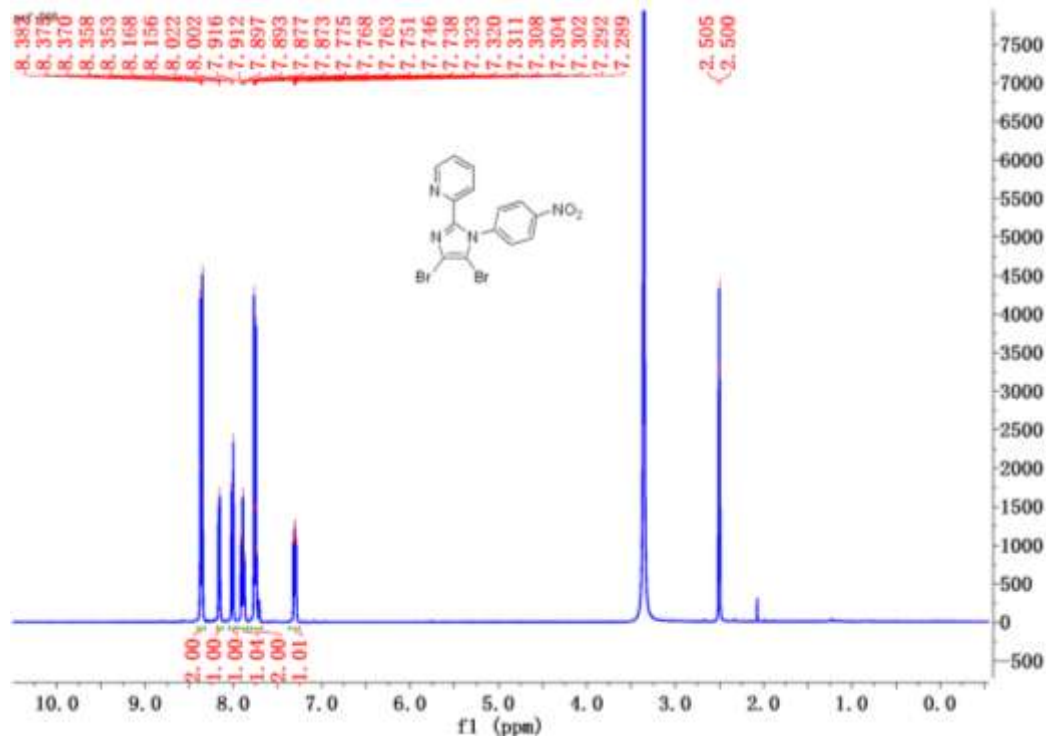



(7)

1-(4-methoxyphenyl)-4,5-bis-[5-chloro-2-methyl-3-thienyl]-2-(2-pyridyl)imidazole (**L1**)

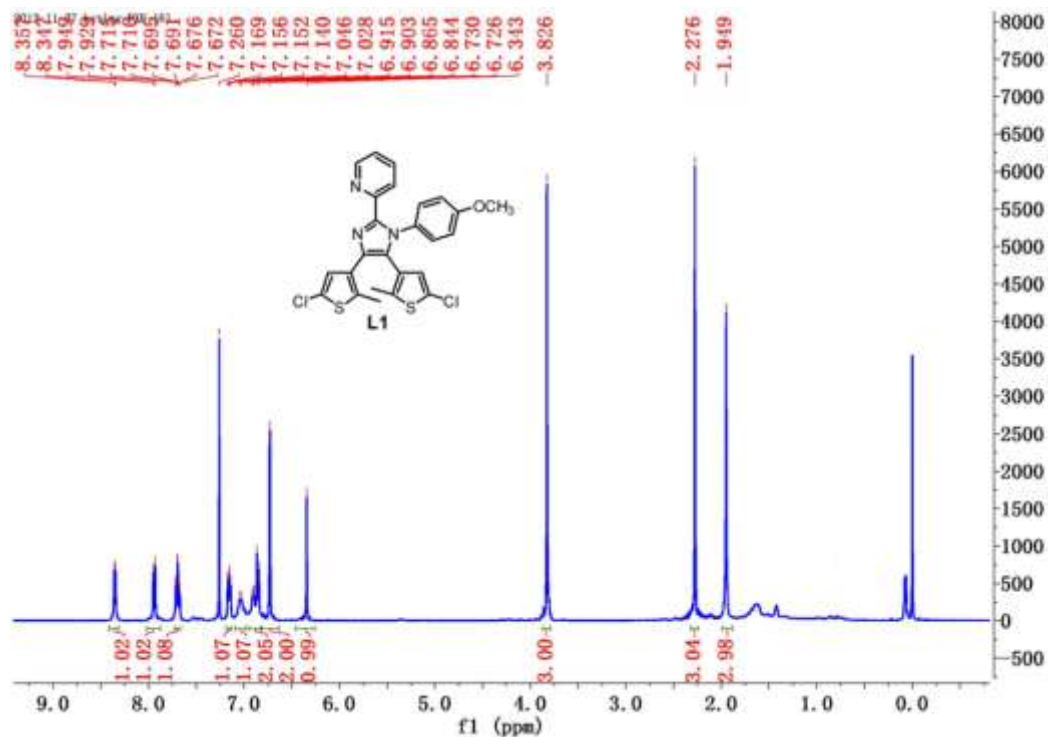

(8) 1-phenyl-4,5-bis-[2-methylbenzo[b]thiophen-3-yl]-2-(2-pyridyl)imidazole (**L2**)

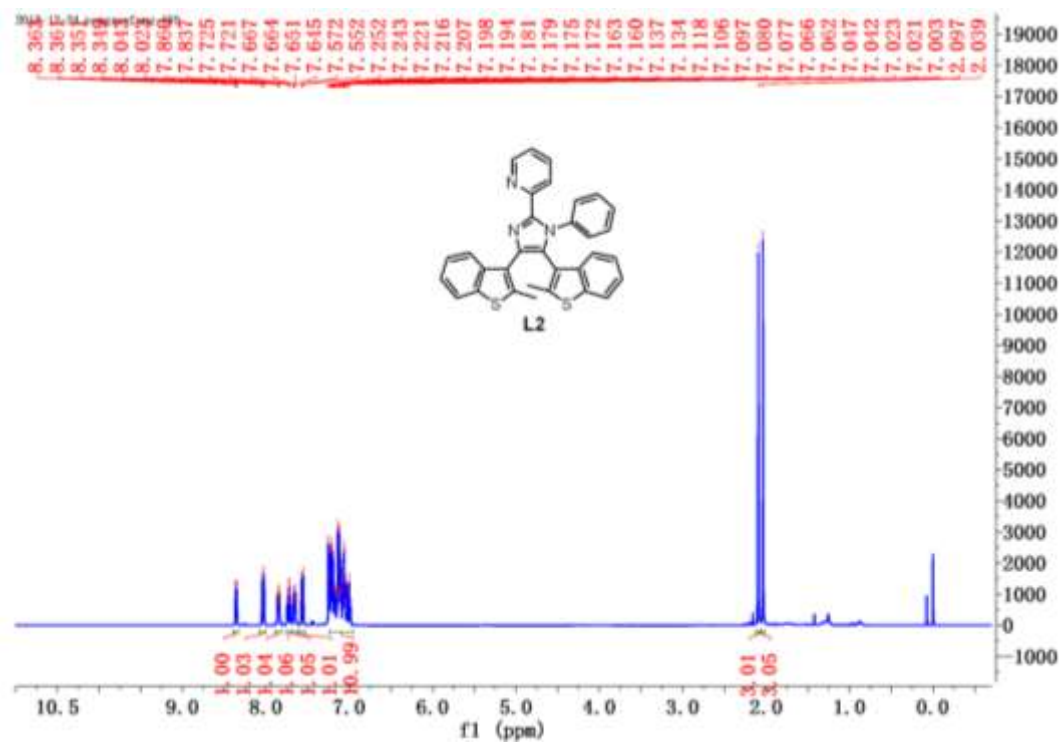

(9) 1-phenyl-4,5-bis-[5-chloro-2-methyl-3-thienyl]-2-(2-pyridyl)imidazole (**L3**)

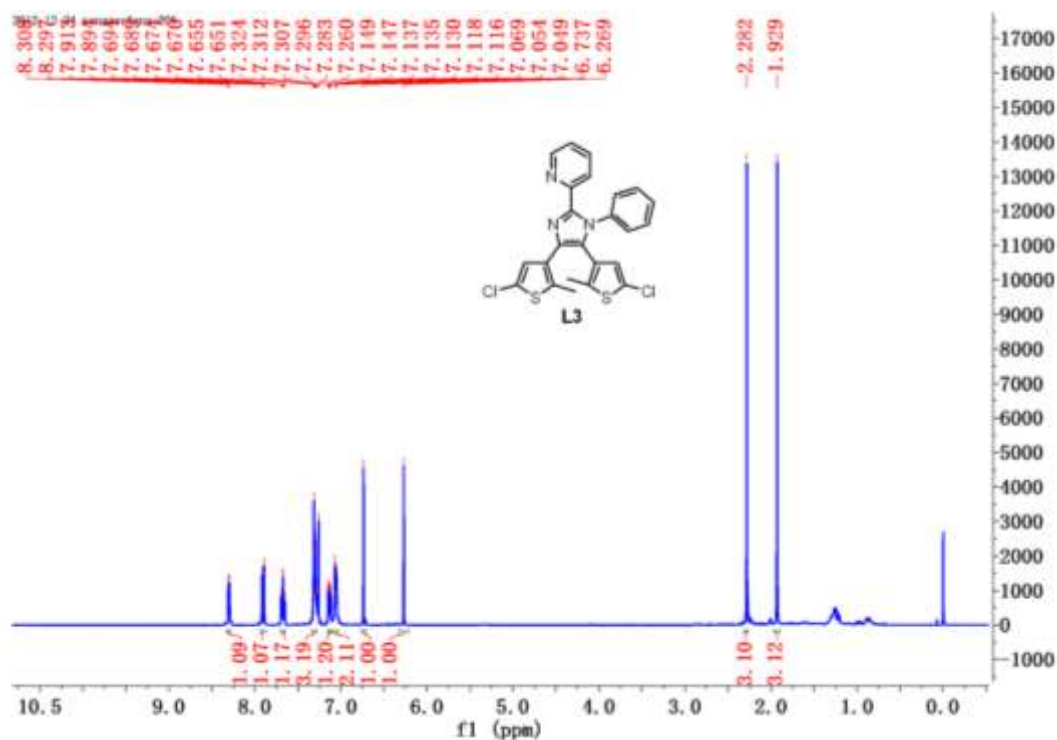

(10) 1-phenyl-4,5-bis-[2,5-dimethyl-3-thienyl]-2-(2-pyridyl)imidazole (**L4**)

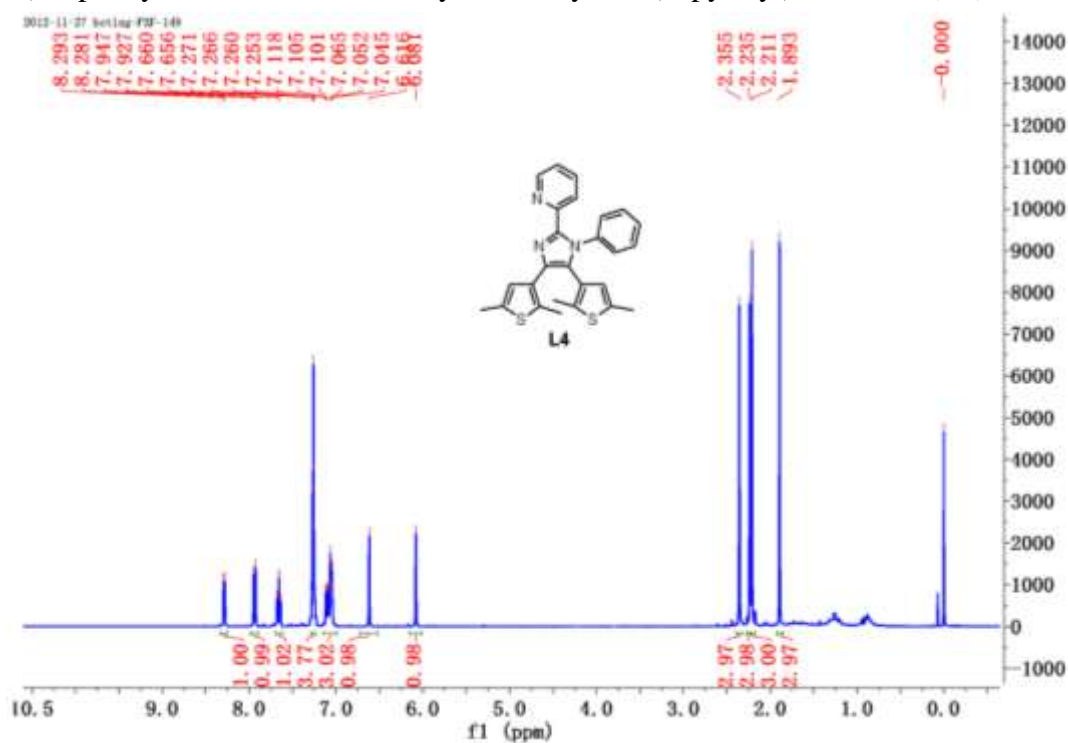

(11)

1-(4-nitrophenyl)-4,5-bis-[5-chloro-2-methyl-3-thienyl]-2-(2-pyridyl)imidazole

(L5)

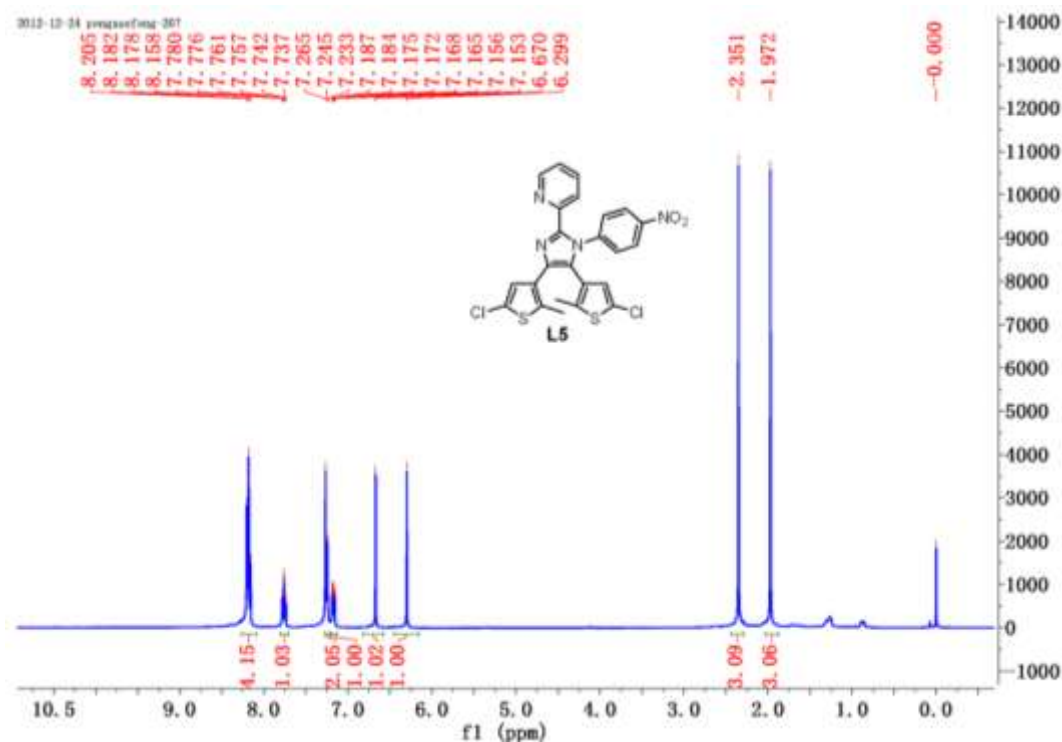

## 7. Copies of <sup>13</sup>C NMR

(1) 1-(4-methoxyphenyl)-2-(2-pyridyl)imidazole (9)

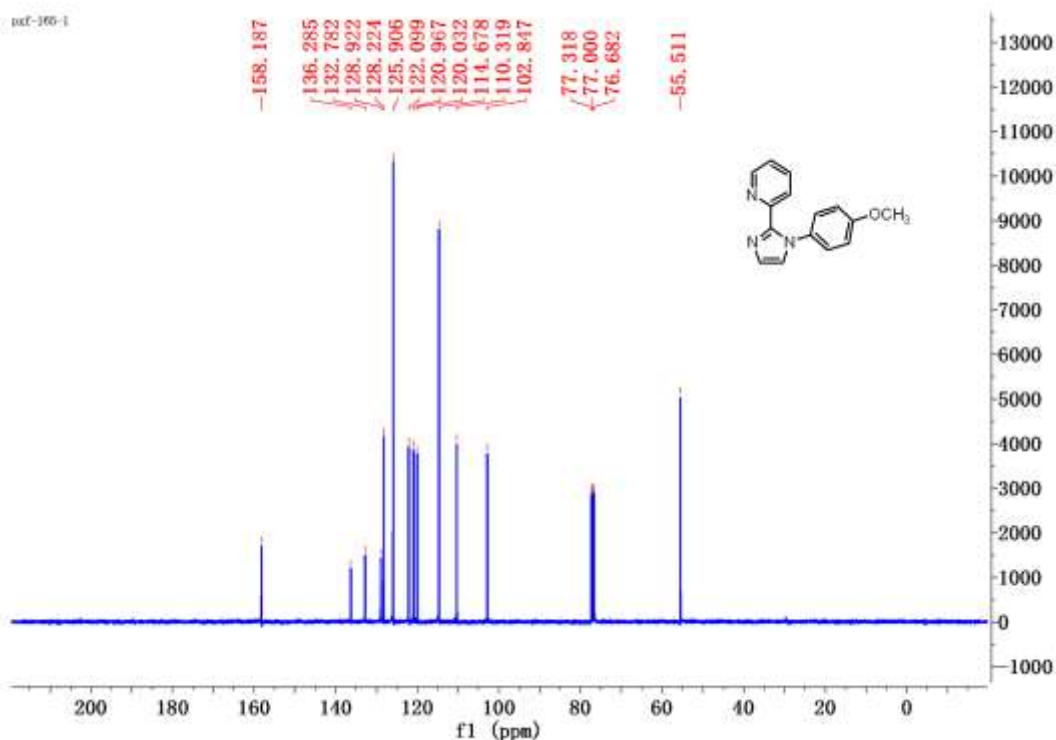

(2) 1-(4-nitrophenyl)-2-(2-pyridyl)imidazole (**11**)

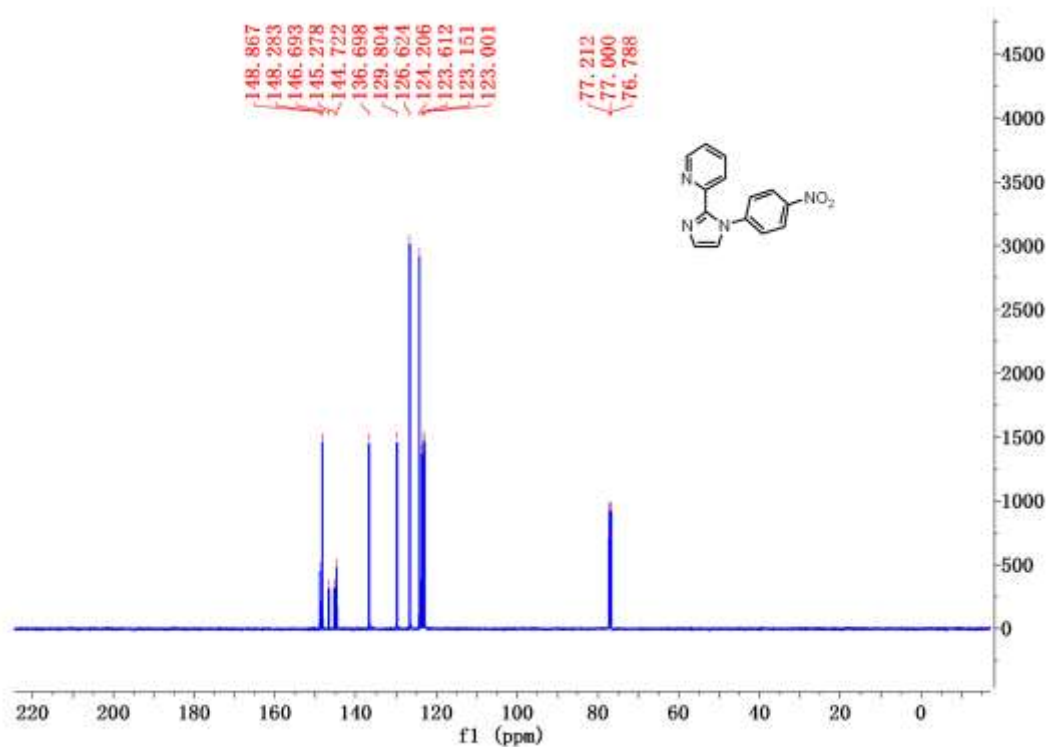

(3) 1-phenyl-4,5-dibromo-2-(2-pyridyl)imidazole (**13**)

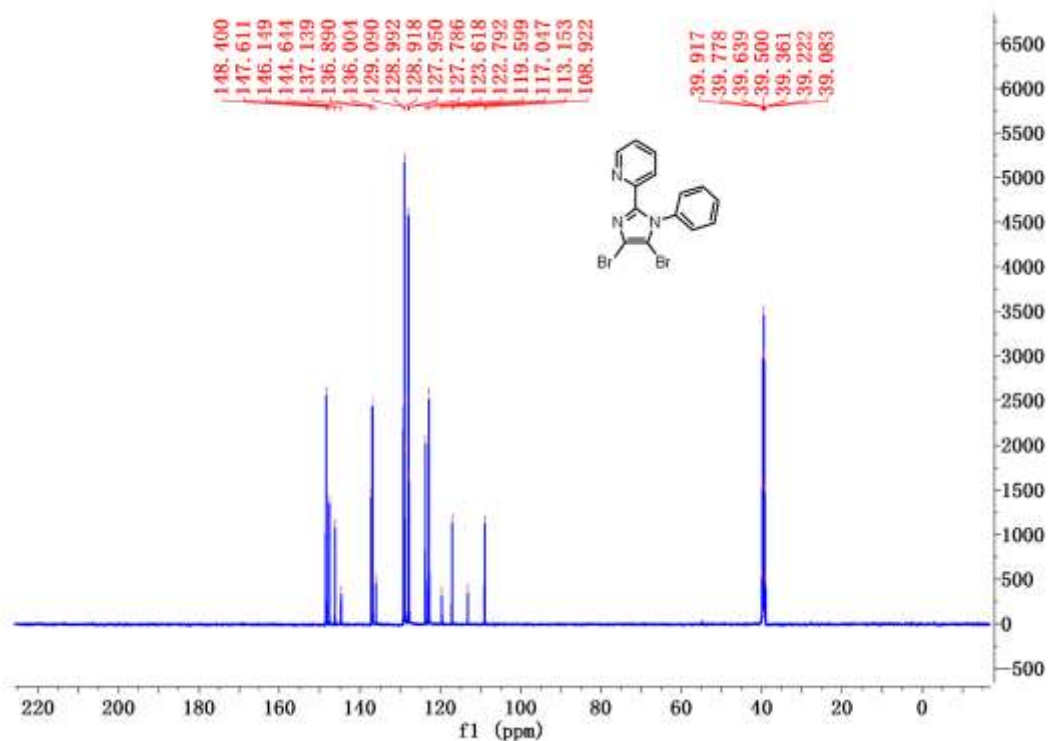

(4) 1-(4-nitrophenyl)-4,5-dibromo-2-(2-pyridyl)imidazole (**14**)

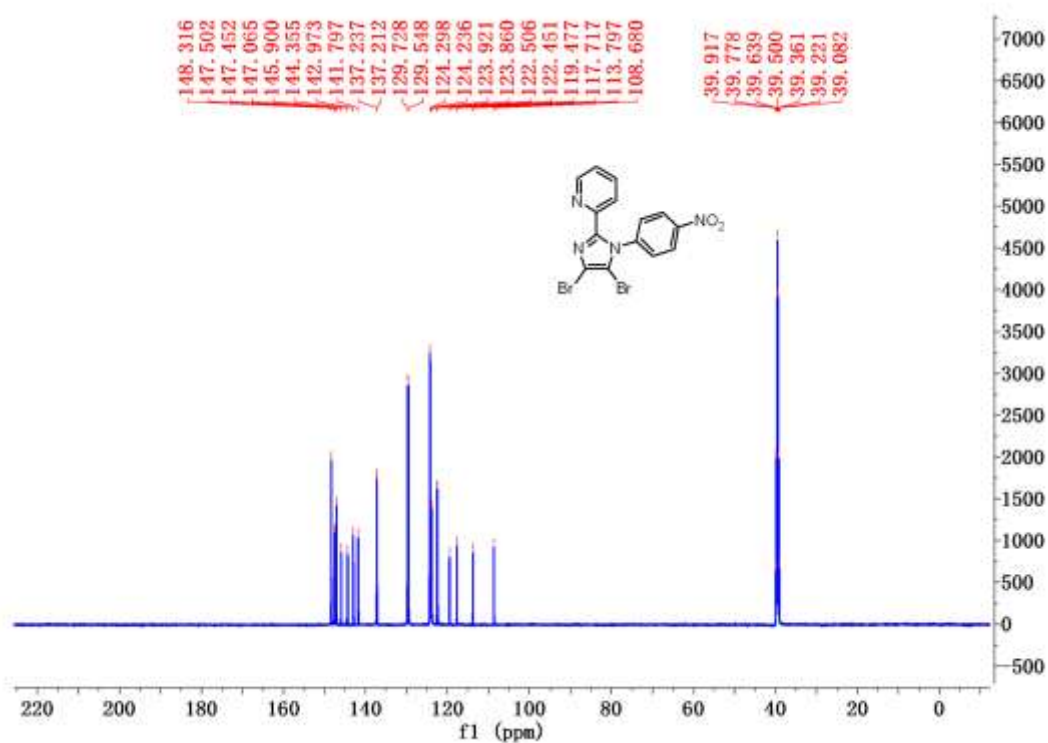

(5)

1-(4-methoxyphenyl)-4,5-bis-[5-chloro-2-methyl-3-thienyl]-2-(2-pyridyl)imidazole (**L1**)

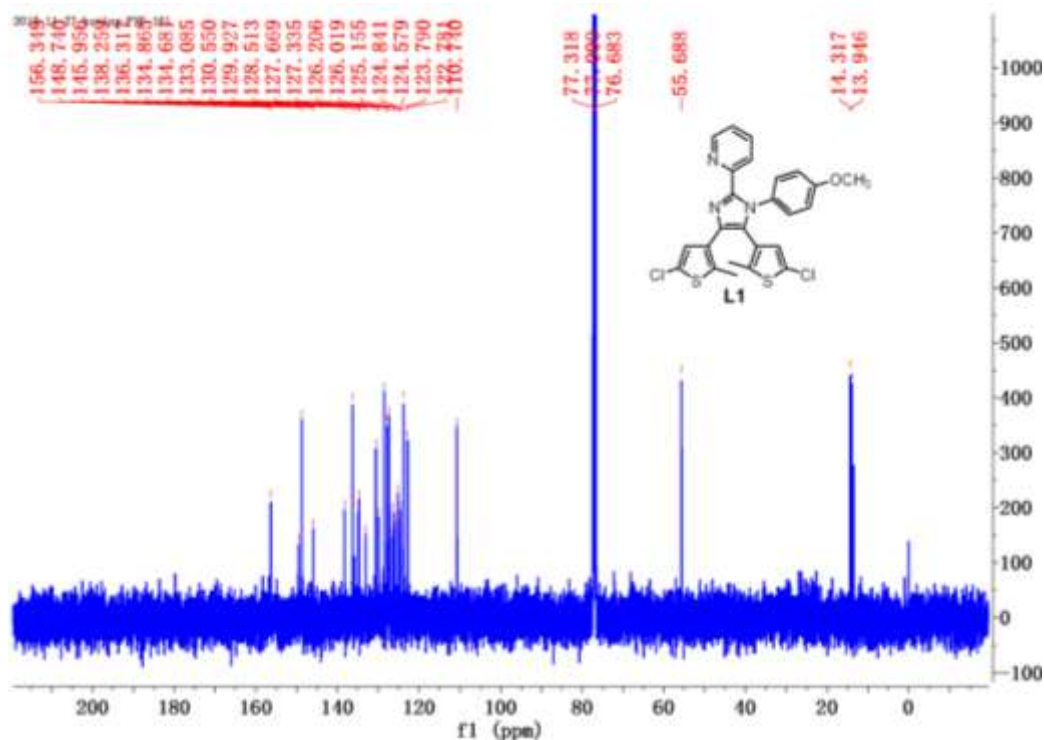

(6) 1-phenyl-4,5-bis-[2-methylbenzo[b]thiophen-3-yl]-2-(2-pyridyl)imidazole (**L2**)

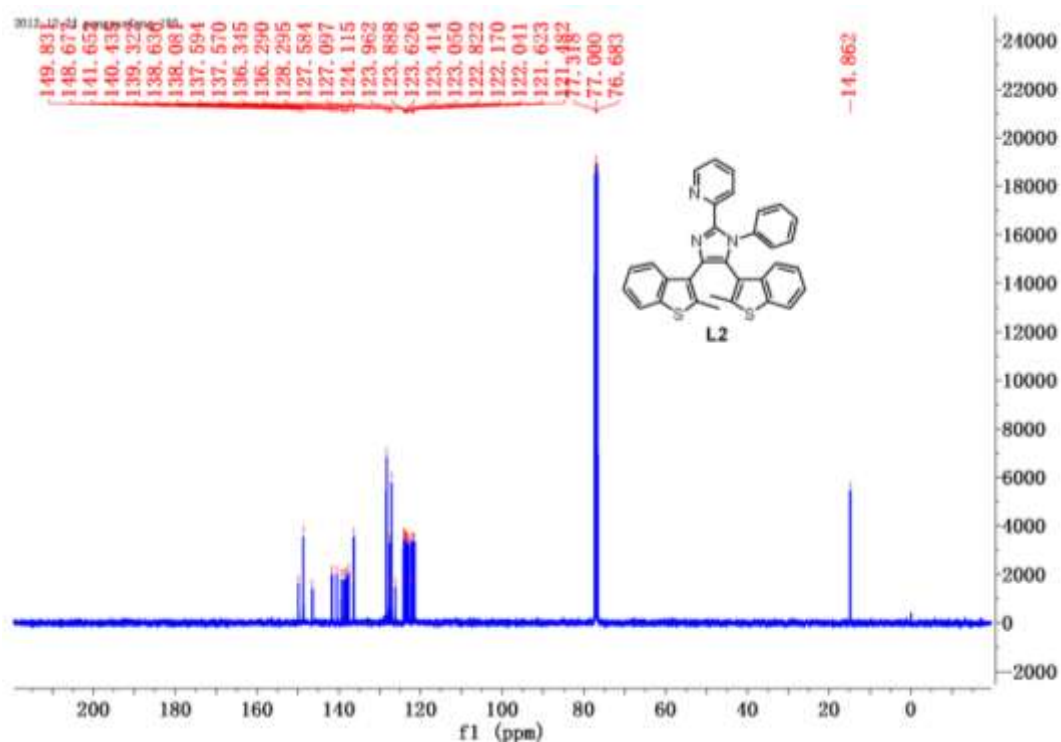

(7) 1-phenyl-4,5-bis-[5-chloro-2-methyl-3-thienyl]-2-(2-pyridyl)imidazole (**L3**)

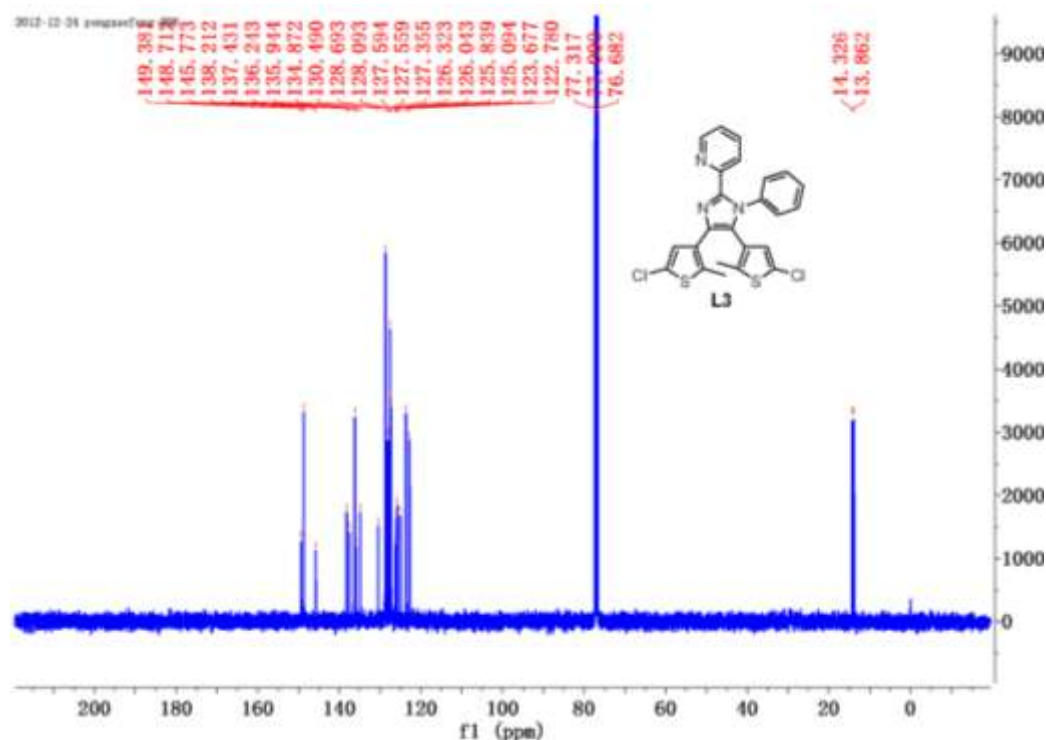



(8) 1-phenyl-4,5-bis-[2,5-dimethyl-3-thienyl]-2-(2-pyridyl)imidazole (**L4**)

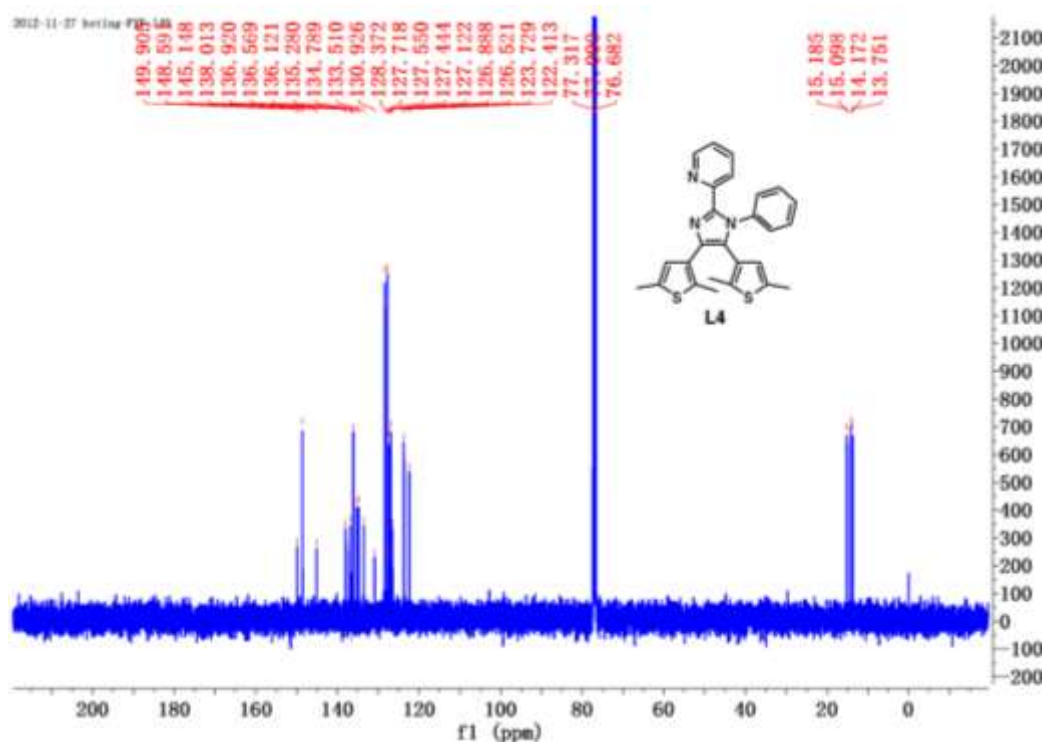

(9) 1-(4-nitrophenyl)-4,5-bis-[5-chloro-2-methyl-3-thienyl]-2-(2-pyridyl)imidazole (**L5**)

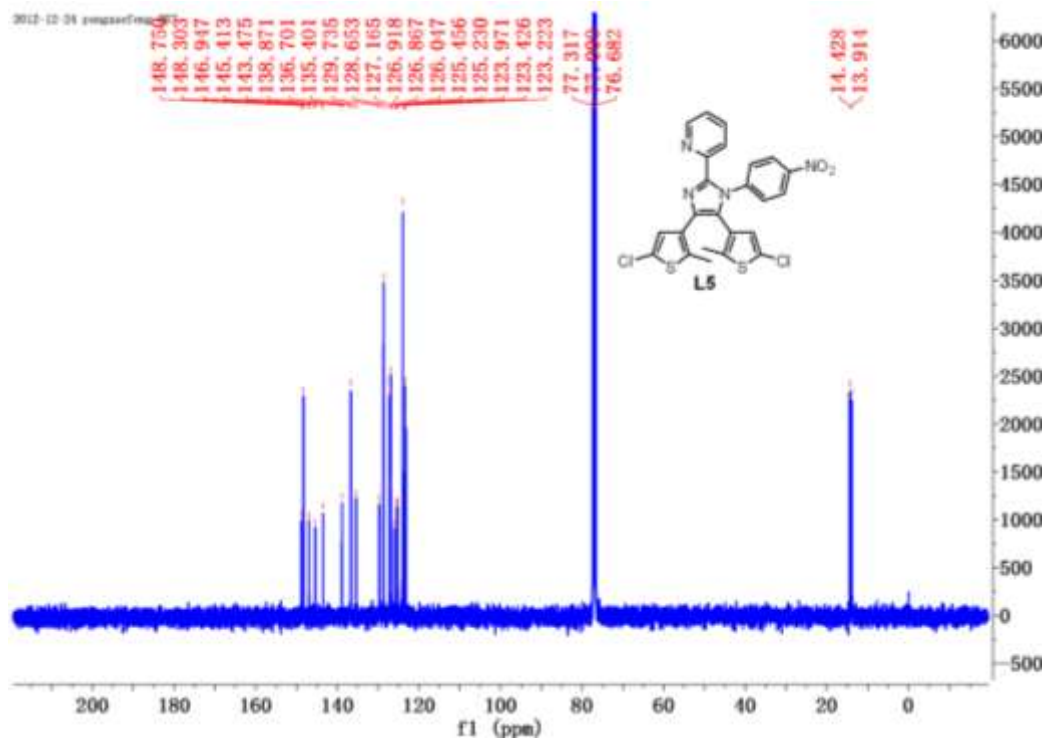

Supplement: c3ra43110j.pdf [file c3ra43110j.pdf]
